# Supplementary material for: Virtual conferences raise standards for accessibility and interactions
Source: eLife. 2020 Nov 4;9:e62668. doi: 10.7554/eLife.62668 (PMC7641586; doi:10.7554/eLife.62668)
Supplement: Supplementary file 1. — Table including the acronyms and abbreviations for all scientific meetings used in the article and where each conference was held. [file elife-62668-supp1.xlsx]

## Sheet: Sheet1
Acronym or abbreviation	Stands for	Meeting Location
ADA 2020	80th American Diabetes Association, a virtual annual meeting	Held online
ADA 2019	79th American Diabetes Association in-person annual meeting	San Francisco, CA
APA 2019	128th American Psychological Association in-person annual meeting	Chicago, IL, USA
APA 2020	129th American Psychological Association virtual annual meeting	Held online
APS 2020	28th American Physical Society, a virtual annual April meeting	Held online
APS 2019	27th American Physical Society in-person annual April meeting	Denver, Colorado, USA
EGU 2020	17th European Geographical Union, a virtual annual general assembly	Held online
EGU 2019	16th European Geographical Union in-person annual general assembly	Vienna, Austria
ESA 2019	104th Ecological Society of America in-person annual meeting	Louisville, Kentucky, USA
ESA 2020	105th Ecological Society of America virtual annual meeting	Held online
JSM 2020	20th Joint Statistical Meeting of American Statistical Association (virtual)	Held online
JSM 2019	19th Joint in-person Statistical Meeting of American Statistical Association	Denver, Colorado, USA
SDB 2020	79th Society for Developmental Biology, a virtual annual meeting	Held online
SDB 2019	78th Society for Developmental Biology in-person annual meeting	Boston, MA, USA
POM 2020	1st Photonics Online Meetup	Held online
Endo 2020	102nd Endocrine Society annual, a virtual meeting	Held online
Endo 2019	101st Endocrine Society annual in-person meeting	New Orleans, LA, USA
ASN 2020	86th American Nutritional Society annual, a virtual meeting	Held online
ASN 2019	85th American Nutritional Society annual in-person meeting	Baltimore, MD, USA
AIDS 2020	23rd International AIDS, a virtual conference	Held online
AIDS 2018	22nd International AIDS in-person conference	Amsterdam, Netherlands
ICLR 2020	8th International Conference for Learning representations (virtual)	Held online
ICLR 2019	7th International in-person Conference for Learning representations	New Orleans, LA, USA
SIIM 2020	40th Society for Imaging Informatics in Medicine, a virtual annual meeting	Held online
SIIM 2019	39th Society for Imaging Informatics in Medicine in-person annual meeting	Austin, TX, USA
ICML 2020	37th International Conference in Machine Learning (virtual)	Held online
ICML 2019	36th International in-person Conference in Machine Learning	Long Beach, CA, USA
AAIC 2020	32nd Alzheimer’s Association, a virtual conference	Held online
AAIC 2019	31st Alzheimer’s Association in-person conference	Los Angeles, CA, USA
ASCO 2020	55th American Society of Clinical Oncology, a virtual annual meeting	Held online
ASCO 2019	54th American Society of Clinical Oncology in-person annual meeting	Chicago, IL, USA
AACR 2020	33rd American Association for Cancer Research, a virtual annual meeting	Held online
AACR 2019	32nd American Association for Cancer Research in-person annual meeting	Atlanta, GA, USA
ASMS 2020	68th American Society for Mass Spectrometry, a virtual annual meeting	Held online
ASMS 2019	67th American Society for Mass Spectrometry in-person annual meeting	Atlanta, GA, USA
TAGC 2020	2nd Allied Genetics Conference (American Genetics Society), a virtual meeting	Held online
TAGC 2016	1st Allied Genetics Conference in-person meeting	Orlando, FL, USA
ASPB 2020	100th American Society for Plant Biology (virtual)	Held online
ASPB 2019	99th American Society for Plant Biology	San Jose, CA, USA
ASHG 2020	74th American Society for Human Genetics, a virtual annual meeting	Held online
ASHG 2019	73rd American Society for Human Genetics in-person annual meeting	Houston, TX, USA
Botany 2020	71th American Botanical Society virtual annual meeting	Held online
Botany 2019	70th American Botanical Society in-person annual meeting	Tucson, Arizona
ASGCT 2020	23rd American Society for Gene & Cell Therapy virtual annual meeting	Held online
ASGCT 2019	22nd American Society for Gene & Cell Therapy in-person annual meeting	Washington, D.C, USA
RECOMB 2020	24th Research in Computational Molecular Biology, a virtual meeting	Held online
RECOMB 2019	23rd Research in Computational Molecular Biology in-person meeting	Washington, D.C, USA
Neuromatch 2020	1st virtual Neuroscience meeting	Held online
Global Immunotalks 2020	1st virtual Immunology conference	Held online
